# Supplementary material for: Statistical calibration of probabilistic medium-range fire weather index forecasts in Europe
Source: Copernicus journal article supplement (doi:10.5194/nhess-2024-57), 2024-05-31
Supplement: Supplementary file 1 [file nhess-2024-57-supplement.pdf]

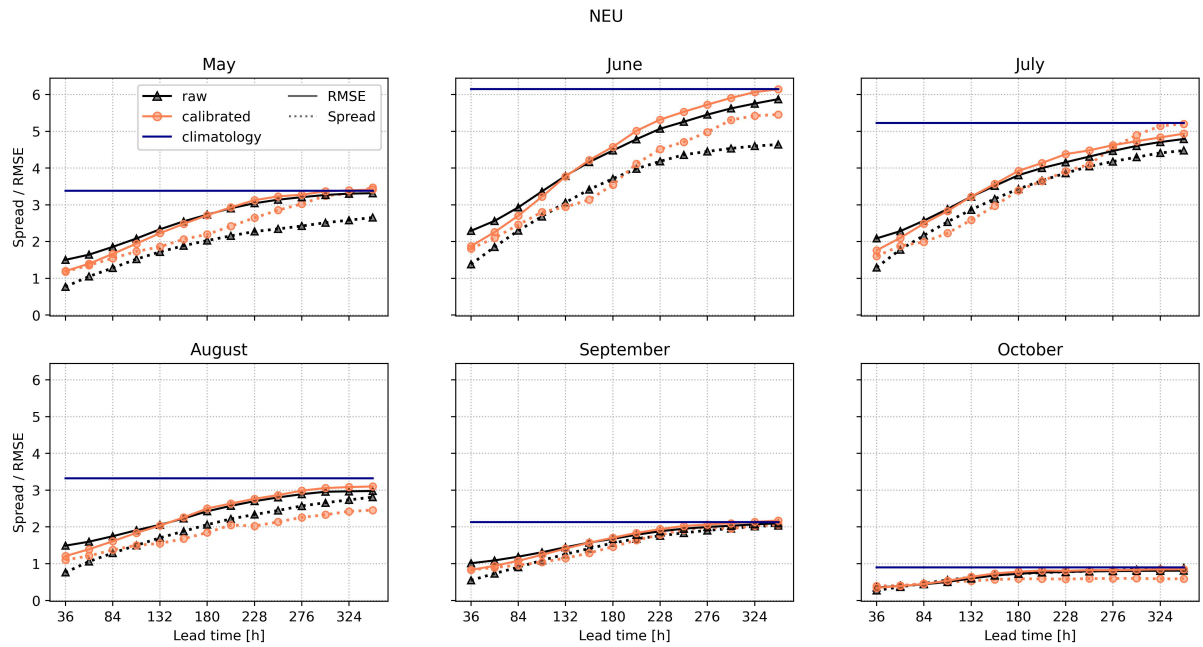

**Figure S1.** Spread and RMSE for raw and calibrated FWI forecasts and RMSE of the climatology averaged over NEU region for each month of the fire season.

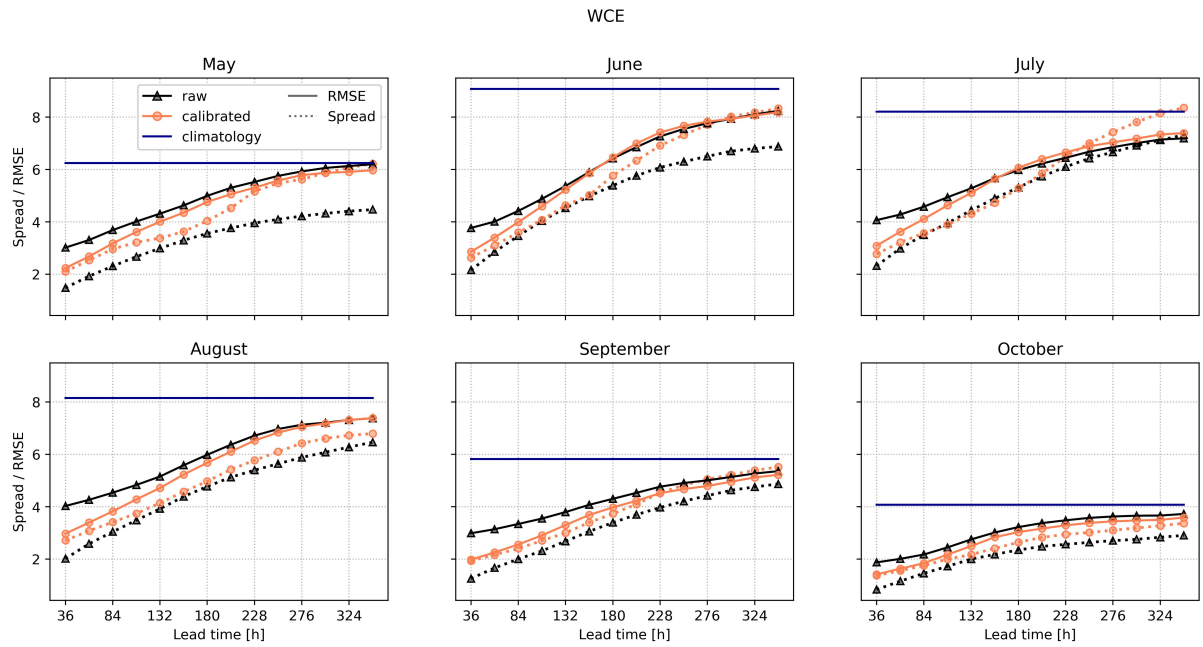

**Figure S2.** Same as S1 for WCE region.

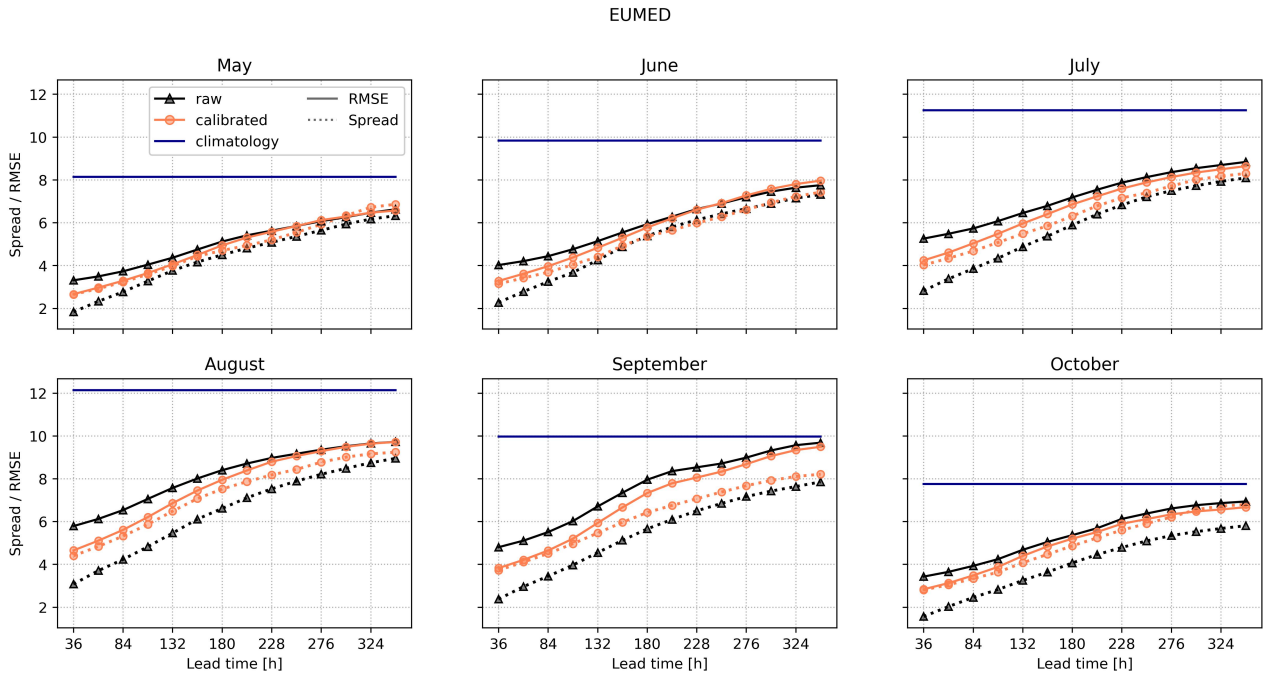

**Figure S3.** Same as Fig. S1 for EUMED region.

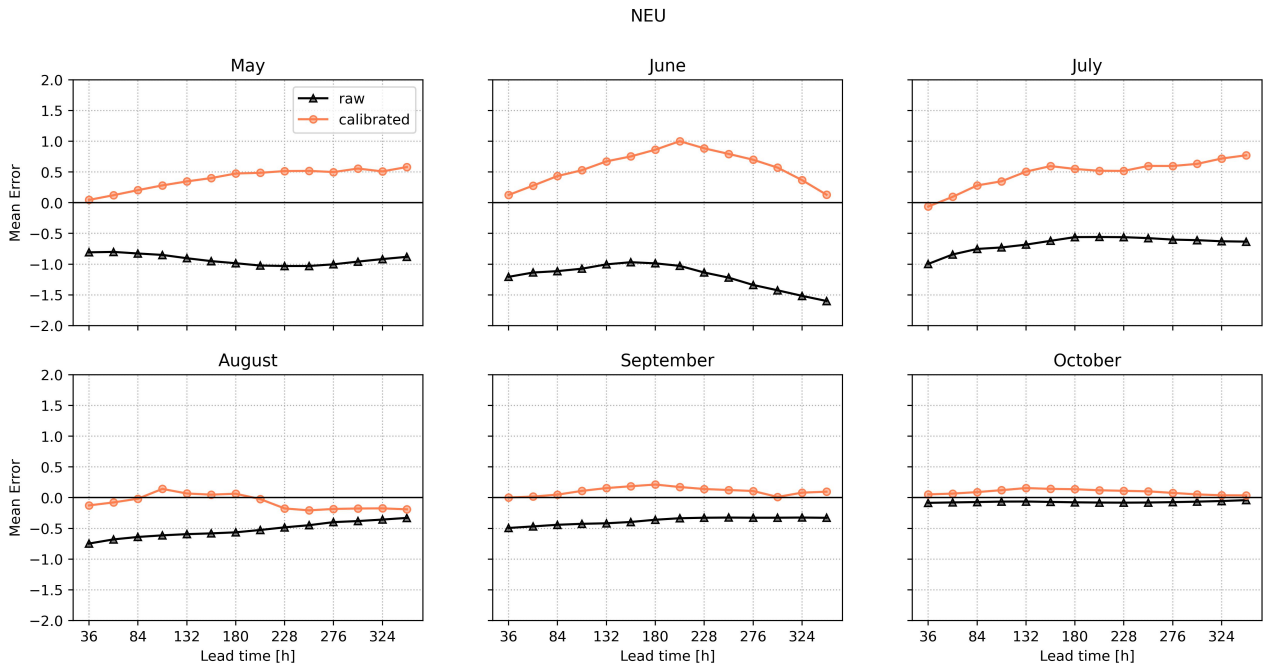

**Figure S4.** Mean error averaged over the NEU region for each month.

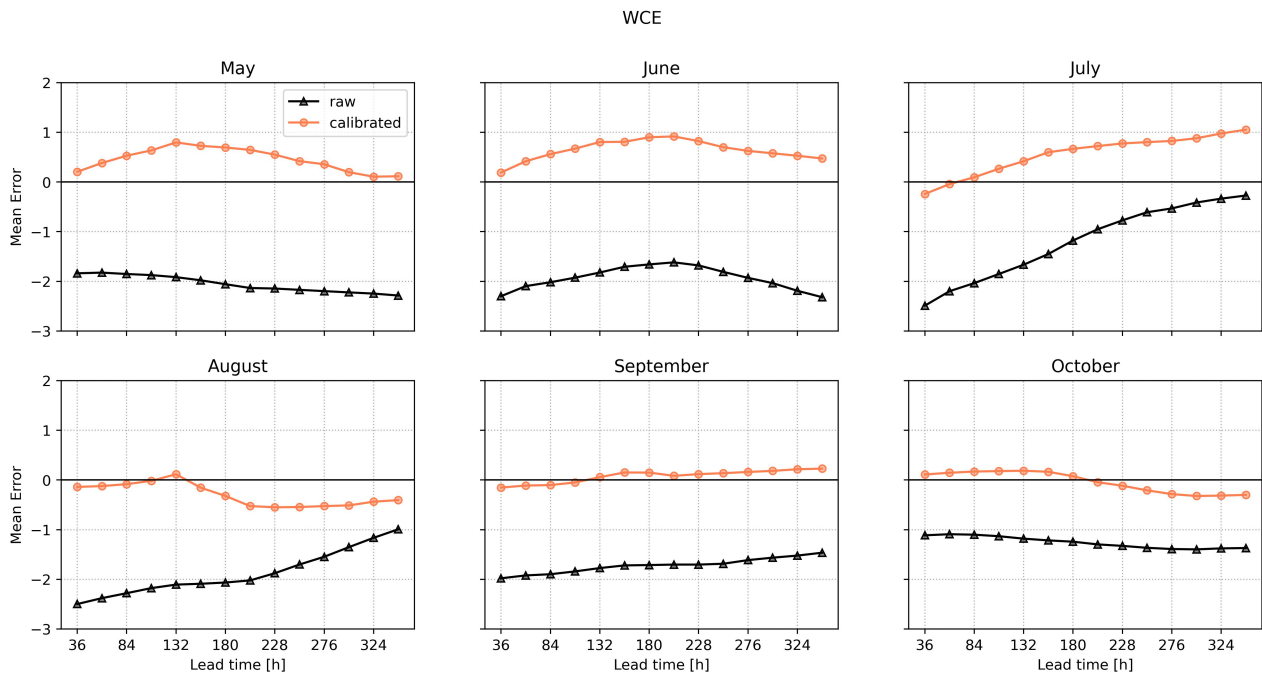

Figure S5. Same as Fig. S4 for WCE region.

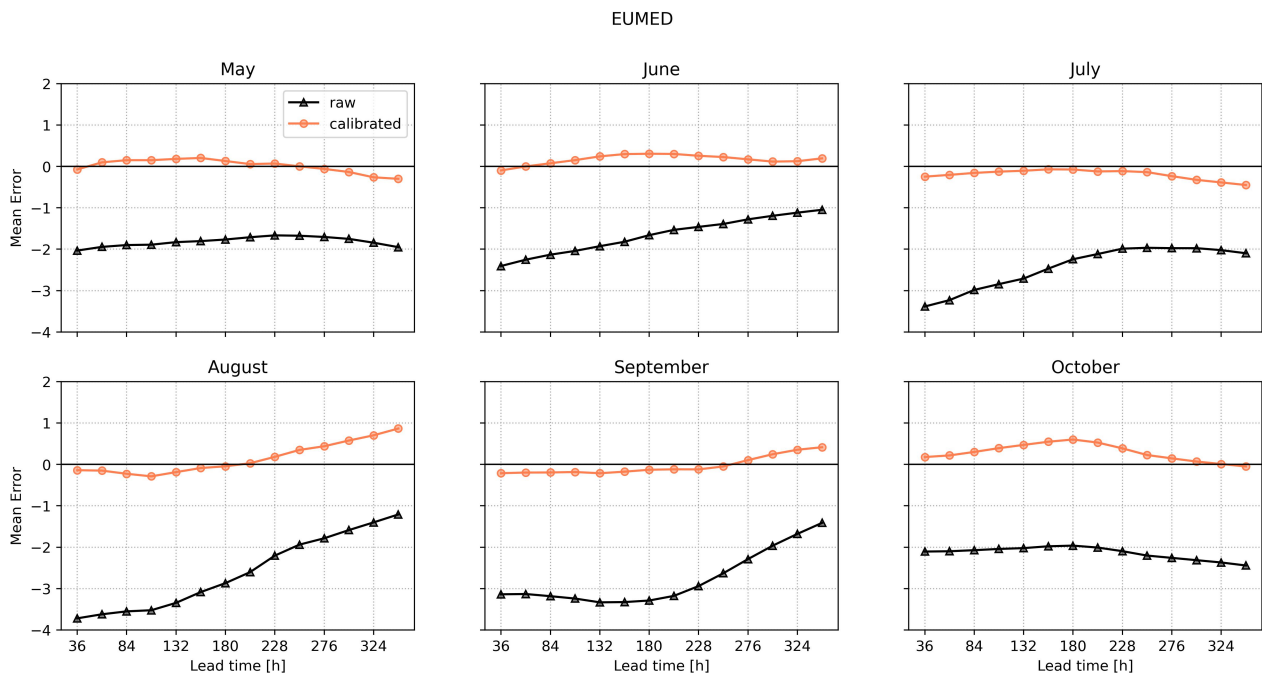

Figure S6. Same as Fig. S4 for EUMED region.

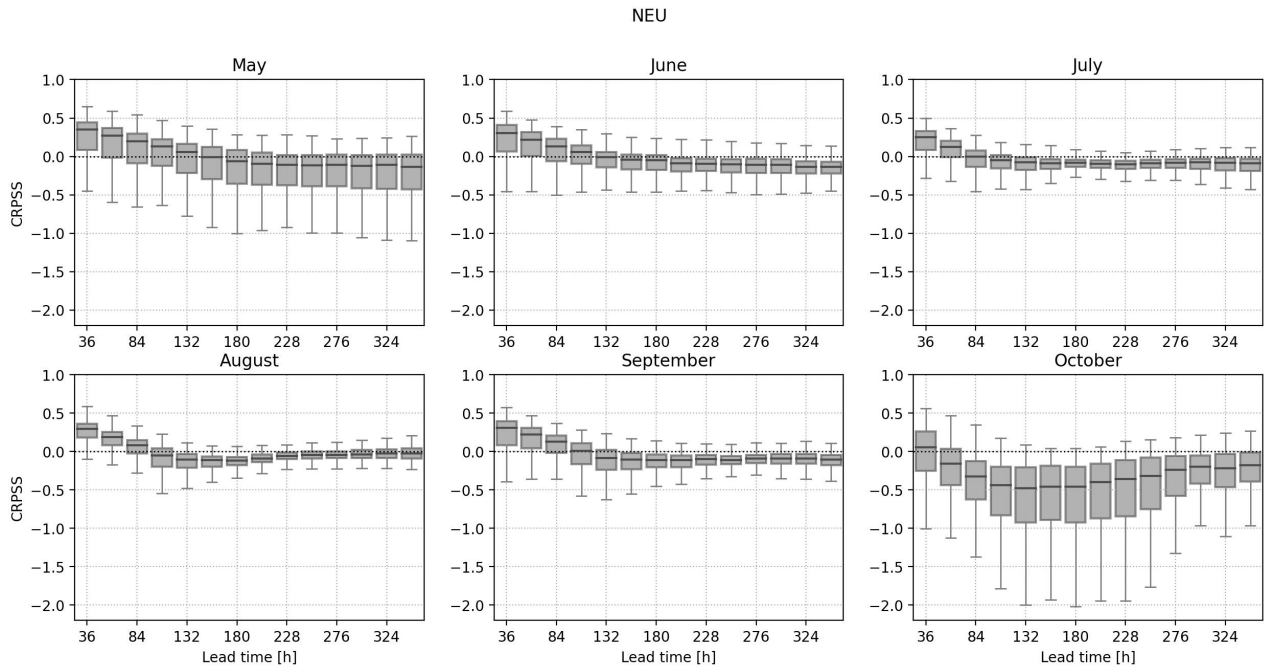

**Figure S7.** Continuous ranked probability skill score with the raw forecast as reference averaged over the NEU region for each month.

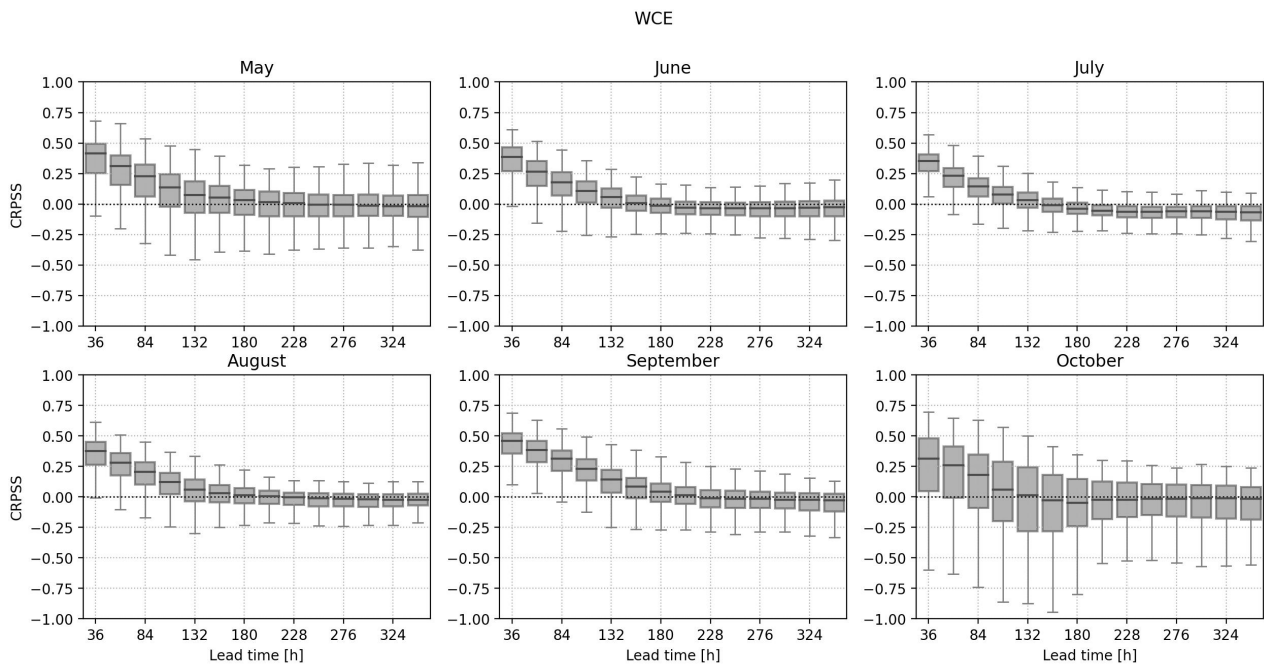

**Figure S8.** Same as Fig. S7 for WCE region.

EUMED

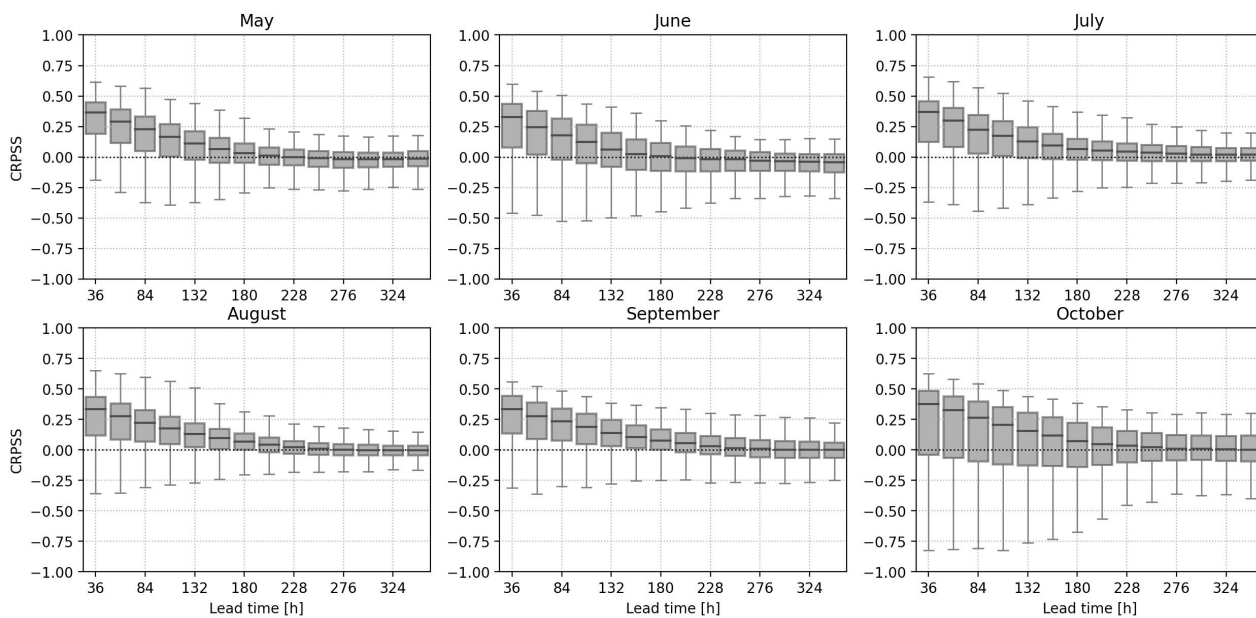

Figure S9. Same as Fig. S7 for EUMED region.
