# Supplementary material for: Statistical calibration of probabilistic medium-range fire weather index forecasts in Europe
Source: Copernicus journal article supplement (doi:10.5194/nhess-2024-57), 2024-05-31
Supplement: Supplementary file [file nhess-2024-57-AC3-supplement.pdf]

## Letter of Reply to Referee 2

Thank you for reading the manuscript and providing valuable suggestions to improve the paper. Our responses to your comments are shown below in blue, and changes to the manuscript are indicated in italics. Additionally, all modifications are marked in the revised manuscript.

### Major comments

1. Study workflow is not very clear, e. g. which datasets are used in which step. This is due to missing research questions and the structure of the manuscript. This should be addressed by:

- a. adding research questions, e. g. can NGR be used to calibrate FWI derived from mid-range weather forecasts, how well does NGR improve the FWI derived from mid-range weather forecast. The research questions should be placed at the end of the introduction, as they help the reader to know what to expect from the following chapters.

Thank you for this comment. We added a sentence stating the research question at the end of the introduction, as follows:

*“In this article, we investigate whether non-homogeneous Gaussian regression (NGR) can be used to calibrate the Fire Weather Index (FWI) derived from medium-range ensemble weather forecasts and assess the extent to which NGR improves the accuracy of the FWI predictions.”*

- b. Restructuring the manuscript by summarizing chapters 2 to 4 to a data and methods section with subchapters (the following is a suggestion):
  - i. 1. Introduction, providing research questions at the end of the chapter
  - ii. 2. Data and Methods,
    1. 2.1 FWI and FWI calculation
    2. 2.2 Forecast and observation data
    3. 2.3. Validation and Calibration methods
      - a. 2.3.1 NGR
      - b. 2.3.2 Verification methods
  - iii. 3. Results
  - iv. 4. Discussion (missing, see other comment.)
  - v. 5. Conclusion

We agree that the restructuring of the manuscript makes the workflow better understandable and adjusted the structure of the manuscript. However, we decided to integrate the Discussion into the conclusion as “4. Discussion and Conclusion”. The new structure of the revised manuscript is as follows:

1. Introduction
2. Data and Methods
  - 2.1. Fire weather index calculation
  - 2.2. Forecast and observation data
  - 2.3. Calibration and verification methods
    - 2.3.1. Non-homogeneous Gaussian regression
    - 2.3.2. Verification metrics
3. Results
4. Discussion and Conclusion

2. Introduction: Please add a paragraph why you chose the NGR method over other methods, e.g. other variations of EMOS calibrations or bias-correction methods (see Whan et al. 2021, <https://doi.org/10.1016/j.wace.2021.100310>).

We added a short paragraph at the end of the introduction mentioning other calibration methods and why we chose NGR.

*“Various methods have been developed for calibrating probabilistic ensemble forecasts. Commonly used calibration methods include Bayesian model averaging (Raftery et al., 2005), non-homogeneous Gaussian regression (Gneiting et al., 2005), logistic regression (Hamill et al., 2004) and non-parametric ensemble post-processing methods such as rank histogram techniques (Hamill and Colucci, 1997), quantile regression (Bremnes, 2004) and ensemble dressing approaches (Roulston and Smith, 2003). Non-homogeneous Gaussian regression (NGR) is one of the most commonly used calibration methods and adjusts both ensemble mean and spread, while still be efficient and easy to implement. It has been proved effective for various weather variables like temperature (Hagedorn et al., 2008), precipitation (Hamill et al., 2008) or wind-speed (Thorarinsdottir and Johnson, 2012) and can be applied using a truncated or censored distribution to account for a constraint to non-negative values.”*

3. Fire weather index calculation: It is not clear how the FWI is derived. Please clarify in section 2 how you derive the FWI, i.e. which R-package or python package you are using, as there are differences between cffrds and the ECMWF fire products derived from the ECMWF GEF- Model (see Vitolo et al. 2019, <https://doi.org/10.1038/sdata.2019.32>)

We agree that it was not very clear how we calculate the FWI. We added a sentence in the end of section 2.1 stating that we have implemented the FWI calculation use Python programming language and following the source code provided by Wang et al. 2015, (<https://publications.gc.ca/site/eng/9.805607/publication.html>), as follows:

*“For this study, we implemented the calculation of the Canadian Forest Fire Weather Index (FWI) using Python programming language, following the source code provided by Wang et al. (2015), with modifications to utilize gridded input data.”*

To check if our implementation provides consistent values with other FWI algorithms, we tested our method using the test values given in Vitolo et al. 2019 and default initial values for FFMC of 85, DMC of 6 and DC of 15 (instead of the ERA5 climatology values used in the presented paper). The outputs closely match those of ECMWF fire products and cffrds, either exactly matching cffrds outputs or falling between the values of ECMWF fire products and cffrds

| Code Source        | FFMC  | DMC  | DC    | ISI   | BUI  | FWI   |
|--------------------|-------|------|-------|-------|------|-------|
| R package cffdrs * | 87.69 | 7.29 | 17.76 | 10.85 | 7.28 | 9.46  |
| ECMWF *            | 87.70 | 8.54 | 19.01 | 10.80 | 8.49 | 10.10 |
| This study         | 87.69 | 7.59 | 18.76 | 10.85 | 7.59 | 9.62  |

\* values taken from Vitolo et al. 2019

#### 4. Forecast and observation data:

- a. Lines 57 – 65: You state that you derive the FWI from the ECMWFs operational forecast system (ENS). Later you state that you use the TIGGE dataset. Can you clarify if you used the ENS dataset, the TIGGE dataset or both datasets later in your analysis? I understand that the TIGGE dataset has a higher temporal resolution than the ENS dataset, however, the spatial resolution is coarser (0.5° vs 0.2°). Later in your results section you show the earliest results for 36h lead time. Can you add a sentence why you are more interested in the increased temporal resolution of the TIGGE dataset over the spatial resolution of the ENS dataset in your manuscript?

The mentioning of ENS and TIGGE dataset is indeed confusing. In this study, we use the ECMWF ensemble forecasts retrieved from the TIGGE database (spatial resolution of 0.5°), although the method is intended for post-processing the operational ECMWF forecast (spatial resolution of 0.2°) to provide FWI forecasts for the SAFERS project. However, we don't have access to multiple years of ECMWF ENS forecast data with higher spatial resolution. To still perform a statistical analysis, we decided to use TIGGE data instead.

To avoid confusion, we decided not to mention ECMWF operational forecasts. Instead, we introduce in the beginning of the chapter 2.2 "Forecast and observation data" all datasets that are used in this study, i.e., the TIGGE ECMWF forecasts, ERA5 reanalysis and High-resolution forecasts.

#### *"2.2 Forecast and observation data"*

*In this study, we use ensemble forecasts from the European Centre for Medium-Range Weather Forecasts (ECMWF) to calculate ensemble forecasts of the FWI. ECMWF medium-range ensemble forecasts consists of 50-members, initialized twice a day at 0000 and 1200*

*UTC and provide forecasts up to 360 hours (15 days). The forecasts are derived from the TIGGE archive (Bougeault et al., 2010), which provides operational medium-range ensemble forecast data for non-commercial research purposes. The data is accessible through the ECMWF API1. The temporal resolution of the ensemble forecast data used in this paper is 6h for all lead times and the spatial resolution is 0.5° (~50 km). We use only the forecasts initialized at 0000 UTC. Although available forecasts cover the whole globe, our focus is on the European region from 25°N to 72°N and 25°W to 39.80°E and we specifically use forecasts from the years 2021 to 2023.*

*For the FWI calculation, we derive initial values for FFMC, DMC, and DC from ERA5 reanalysis data (Hersbach et al., 2020) to account for preceding conditions at forecast initialization. The initial values are determined using the climatological from 40 years of historical data (1980-2019) for each day of the year, using a 15-day rolling mean centered on each day. ERA5 reanalysis data can be retrieved from the C3S Climate Data Store (CDS) (Hersbach et al., 2017).*

*For calibration and verification purposes, we use ECMWF high-resolution forecasts initialized at 0000 UTC. ECMWF high-resolution forecasts have a spatial resolution of 0.1° (~9 km) and a temporal resolution of 1 hour and can therefore give a more accurate picture of the actual weather conditions than medium-range ensemble forecasts with a coarser resolution. The FWI values calculated using ECMWF high-resolution forecasts with the shortest lead time to the local noon with corresponding 24h precipitation act as substitute for actual observations and are hereafter called analysis. Ideally, FWI forecasts would be verified using FWI values calculated using surface observations of the relevant weather parameters as the FWI cannot be observed directly. However, measurement stations that provide continuous observations of all necessary weather parameters are sparse and only yield point-wise verification. Furthermore, for an operational calibration of the FWI, observation data needs to be available rapidly.”*

- b. Lines 65 – 68: These sentences should be moved to the paragraph where you discuss how you verify the FWI from ECMWF data to observation data.

We moved these sentences to fit better in the context of the verification of FWI analysis and observation data. Please see changes to Section 2.2 given in the previous comment.

- c. Line 68: “We therefore use the FWI calculated ECMWF high-resolution forecasts ...”. You did not introduce what the ECMWF high-resolution forecasts are yet. You can optimize this by merging this sentence with the next sentence (i. e. “ECMWF high-resolution forecasts have ...”), but it remains now unclear why you introduced the

ENS and the TIGGE dataset before. Please clarify in this section on which datasets you derive the FWI from and for which later steps you use which datasets (NGR regression and verification).

This section (2.2) has been completely rewritten to make it more clear which dataset is used for which step and to accommodate the changes to Figure 1 suggested by referee 1. Please see reply to comment 4a and second major comment of referee 1.

#### 5. Results / Figures:

- a. All figures with subplots: add labels for subplots, i. e., (a), (b), (c) as suggested in the NHES publication guidelines (<https://www.natural-hazards-and-earth-system-sciences.net/submission.html#figurestables>)

Labels have been added to all subplots to be in accordance with the guidelines.

- b. In your written text you relate to lead times as days while in the figures you show lead time in hours on the x-axis. Can you synchronize this information? In the current state the reader has to transform between written “7 days” to 7\*24h in the x-axis of the respective plot. You could write the hour also in brackets next to the days in the text.

We believe the article is easier to follow using lead times in days instead of hours but agree that using both units throughout the manuscript is confusing. We applied the suggested changes and added the lead time in hours after every mention of the lead time in days. Please note that the lead times in hours do not exactly correspond to the typical conversion of days to hours (e.g., 7 days is here 180 hours instead of 168 hours). This is because FWI forecast are issued for 12 UTC while they are initialized at 00 UTC. The first day’s forecast has therefore a lead time of 36 hours and not 24 hours.

6. Terminology “short lead times”: You state multiple times that your results work best for short lead times. Can you clarify in your manuscript how you define short lead times (e. g. 72h or 132h) or be more specific which lead time you still find good performing (e. g. rephrasing to something like: “for short lead times up to 84h”).

Thank you for this comment. We agree that it is not very clear what is meant with short lead times. We clarified in the manuscript that an improvement is visible for all regions up to a lead time of 84 hours, and we added this information to every instance where we mention that the method works best for short lead times.

7. The discussion is missing. In my opinion the discussion is an integral part of a research paper and as the of the study presents a novel way of calibrating mid-range weather forecasts, it would be good to critically reflect on the results:

- a. Is the FWI a suitable predictor for fire events in all three regions? What are the challenges regarding wildfire hazard in the three regions? For example, you could address why the postprocessing works particularly well in the MED and summer months of WEU and why not for NEU? Further, you could reflect on how low FWI values, as present in NEU, affect your method.
- b. How does your method (NGR) compare to other post-processing methods? Select a two to three different studies, with a similar research question and set your results in a broader context. For example, you could discuss why you are correcting the FWI instead of the input variables of the FWI, why you chose the NGR method and not a bias correction method or machine learning based method (see Whan et al. 2021 (<https://www.sciencedirect.com/science/article/pii/S2212094721000086>) and Worsnop et al. 2021 (<https://journals.ametsoc.org/view/journals/wefo/36/6/WAF-D-21-0075.1.xml?alreadyAuthRedirecting>))
- c. What can stakeholders take away from your study. You illustrated quite nicely in the introduction that post-processing helps to make accurate forecasts helping first responders. What do you wish this target group takes away from your results, e. g. will more firefighting resources be placed at locations with elevated FWI?

Thanks for this comment. We decided to incorporate the discussion in the conclusion, which reads now as follows:

*“We investigated whether non-homogeneous Gaussian regression (NGR) can be used to calibrate fire weather index (FWI) forecasts based on medium range ensemble weather forecasts by the European Centre for Medium-Range Weather Forecasts ensemble forecasts (ECMWF). To estimate the calibration coefficients of the NGR, we employ a truncated Gaussian distribution with cut-off at zero and use forecast and observation pairs of the last 30 days preceding the forecast. We used ECMWF high-resolution weather forecasts with the shortest possible lead time to calculate the FWI analysis and used these as substitute for observations. Although the FWI analysis seems to underestimate the FWI slightly, a good correlation is observed.*

*FWI forecasts using medium range ensemble weather forecasts perform generally quite well when compared to the analysis. However, calibration improves the forecasts especially at short lead times up to 84 hours. In the Mediterranean region and Central Europe an improvement of FWI forecast with respect to the FWI analysis is also apparent for longer lead times up to 8 to 10 days, respectively. This is likely caused by the generally higher values in those regions and is supported by the monthly averaged metrics in the appendix, which*

*show a stronger improvement caused by the calibration in the months with high FWI values. Hence, it can be concluded that the calibration performs better for higher FWI values, as indicated by the better performance during the summer months in West and Central Europe and in the European Mediterranean. However, the calibration method shows limitations for low FWI values, which could be observed in the NEU reference region and especially for longer lead times. Although it would be ideal for the method to perform effectively across the entire range of FWI values, it is generally more critical that it demonstrates a good performance at higher FWI values, where the potential fire danger is more significant. While long-range forecasts of potential fire danger are valuable, short-range forecasts, especially for the first 1-3 days, are usually more critical for firefighting resource management. Reliable and accurate forecasts, particularly when the fire risk is high and over the short-term time frame, are crucial for decision-makers and emergency responders to effectively coordinate resources. The improvement of FWI forecasts using the presented calibration method improves the ability to anticipate fire danger, ultimately supporting better response management and shows that a relatively simple method can provide good results compared to more complex approaches, e.g., bias correction (Cannon, 2018) or the correction of the input parameters instead of the FWI as in Worsnop et al. (2021). When correcting the individual input parameters, different models need to be applied for the individual variables, which require careful verification and access to quality controlled observation over the whole study region. To further improve the presented calibration method for fire weather index forecasts, it could be tested if calibration of individual components of the FWI system e.g. FFMC, DMC and DC would improve overall skill of the forecast. Furthermore, more advanced models using additional predictors, e.g. elevation or land-use, could improve the calibration but were not tested here.”*

The take-away message of our study is that NGR can improve FWI forecasts and therefore provide more accurate predictions of potential fire danger. In addition to being illustrated in the introduction, we again mention this now in the conclusion, also. We refrain from giving suggestions for possible actions based on the provided results, e.g. making suggestions for firefighting resources, as this is not the purpose of this article. However, supporting firefighting resources is the objective of the SAFERS EU project, which is mentioned in the introduction.

## **Minor comments**

1. Line 6 & Line9: you use the terms post-processing and calibration interchangeable, please choose one term.

Thanks for pointing this out. We decided to use the term calibration and changed this throughout the manuscript.

2. Lines 9 – 11: Be more specific about what you mean by short lead times (e. g. 84h?) and regions with elevated FWI (e. g. MEU)

We included more specific information about the lead time and region as follows:

“The calibration improves FWI forecast particularly at shorter lead times up to 84 hours and in regions with elevated FWI values, i.e., areas with a higher wildfire risk like Central and Mediterranean Europe. “

3. Lines 13: I would drop the word “recent” and replace “wildfire in Greece 2023” by “wildfire season of 2023”.

We changed the sentence according to your suggestion.

4. Line 15: Drop “Also” at beginning of sentence.

We rephrased this sentence to avoid starting with “Also”.

5. Line 16: Drop “But” or make this sentence sound more formal.

We rephrased the whole sentence in order to sound more formal and to accommodate the added references (comment 6).

“While the Mediterranean region continues to face the highest occurrence of wildfires, Central and Northern Europe have experienced an increase in extreme temperature events and heatwaves in recent years (Ibebuchi and Abu, 2023; Rousi et al., 2023; Ionita et al., 2017; Barriopedro et al., 2011). Extended warm and dry periods raise the fire danger and may cause wildfires in regions that were previously not considered wildfire hotspots (San-Miguel-Ayanz et al., 2021; De Rigo et al., 2017). Examples are the 2018 heatwave, which caused wildfires in Sweden (San-Miguel-Ayanz et al., 2019) and across the United Kingdom (Sibley, 2019) or the wildfire outbreaks in Germany and the Czech Republic during the summer of 2022 (Skacel et al., 2022).”

6. Line 17: Provide references for your statement.

References for the increased extreme temperatures and heatwaves have been added to the statement (see comment 5).

7. Line 19: Provide references for your statement.



References are added (see comment 5).

8. Line 20: Here it would be great if more than one example could be provided, e. g. one for each subregion.

We added two more examples, one of which is for the WCE subregion (see comment 5).

9. Lines 22 – 25: Switch the order of the sentence to stress more clearly that weather forecast is part of SAFERS or drop mentioning the project.

We changed the order of the sentence to make it more clear that the weather forecasts are part of SAFERS.

10. Line 26: Add Di Giuseppe et al. 2016 (<https://doi.org/10.1175/JAMC-D-15-0297.1>) as a reference.

The suggested reference has been added to this sentence.

11. Line 26: Watch out that your citation tool takes the names correctly. It is van Wagner and Di Giuseppe not Wagner and Giuseppe.

All author names with surname prefixes have been checked and corrected.

12. End of line 27: Here I am missing a short explanation of what is the difference between deterministic and probabilistic weather forecast. A short explanation would be helpful to emphasize that the topic of the manuscript is postprocessing probabilistic forecasts.

We added a short explanation of the difference between deterministic and probabilistic forecasts.

“While deterministic forecasts provide a single forecast based on a given set of initial conditions, probabilistic ensemble forecasts offer a range of possible outcomes by using slightly perturbed initial conditions, giving a more comprehensive picture of potential weather conditions and providing an estimate of the forecast uncertainty.”

13. Line 28: drop the word “may” or provide a clear statement whether post-processing is needed. Consider also my first comment on your interchangeable usage of post-processing and calibration. This confuses the reader.

We dropped the word “may” and changed post-processing to calibration.

14. Line 39: Chose a more scientific formulation than “is a relative simple calculation” for the FWI.

We changed the formulation of this sentence to “*straightforward computation*”.

15. Line 43: Add the depth of the moisture levels.

The depth and type of fuel layer have been added. All changes to the FWI calculation section (2.1) can be seen in referee 1, comment 1.

16. Line 48: Rephrase the sentence starting with often, e. g. “The FWI can be classified”

The sentence has been rephrased to:

“The FWI is often classified into danger classes and values above 50 are considered extreme.”

17. Lines 52 – 54: I would change the order of the sentences to make the statement at the beginning of the paragraph clearer, e. g. “we use climatological mean values ..., to account for preceding conditions at the initialization”.

We follow you suggestion and changed the order of sentences.

18. Lines 59, 63 and 70: Please provide an approximation of the grid resolution in km in brackets?

An approximation of the grid resolution in km has been added in those locations.

19. Line 60: it should be “derived from the TIGGE archive”.

The article has been added.

20. Line 61 and following: Please add dataset after TIGGE, i. e., “The TIGGE dataset ...”.

We completely rewrote the forecast and observation data section (2.2) and don’t refer to the TIGGE dataset in those sentences anymore.

21. Line 62: Please add “the” to ECMWF API.

We added the article “the”.

22. Line 62: Please rephrase sentence to “the temporal resolution of the TIGGE dataset ...”.

We rephrased this sentence to:

*“The temporal resolution of the ensemble forecast data used in this paper is 6h for all lead times and the spatial resolution is 0.5° (~50 km)”*

23. Lines 65 – 78: Please rephrase this paragraph. Keep the statement that the FWI has multiple input variables. Explain for which later steps you use which dataset to calculate the FWI. Mentioning the station data here is confusing.

We rephrased the whole section 2.2 (see major comment 4) and hope it now clear which dataset is used for which step. The station data is now mentioned in the second part of this section after introducing all forecast datasets.

24. Line 71: I am not sure which dataset you are meaning by “those”, please clarify.

Section 2.2 has been completely rewritten and it should now be clear which dataset is meant.

25. Line 75: How many of the 682 stations are in Finland and how many are outside of Finland. Can you provide values.

Because the correlation coefficient of FWI analysis and FWI observation is basically identical for Finland and the stations outside Finland and no additional conclusions can be drawn by separating Finland from the rest of the stations, we decided to merge the dataset. It is therefore no longer necessary to mention the number of stations in Finland separately.

26. Fig 1 / Line 74 (first mentioned):

- Add letters for subfigures.
- Fig 1a
  - Use a different projection, e. g. Lambert Conformal Conic, as the northern latitudes are strongly distorted.
  - It would be very nice to have the stations shown in Fig 1c on the map of Fig 1a as well.
  - Place the region legend (i.e., NEU, WCE, EUMED) inside Fig 1a.

- Place the legend of the countries (i.e., Finland and others) at a position, where it is clear the legend belongs to both Figures (i. e. Fig 1a and Fig1b)

We implemented all suggested changes in Fig. 1a.

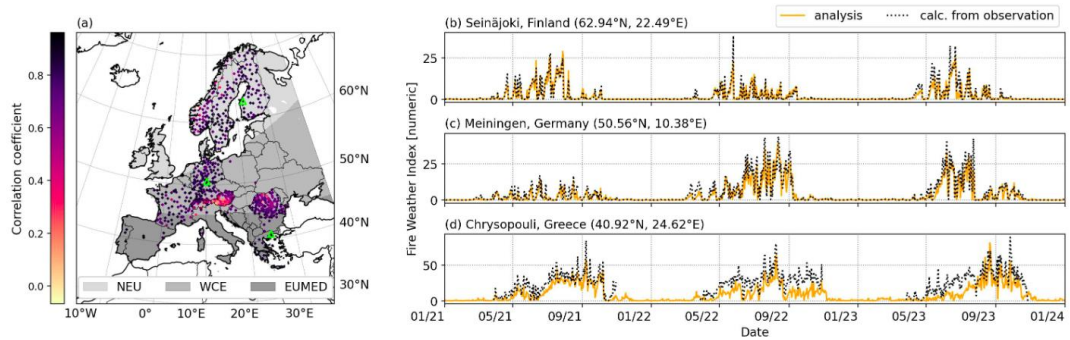

Fig1

- Fig 1b:
  - Provide a legend for the regression line. Is this the line for all stations, or for only “other” stations (outside of Finland) or for only Finland stations?
  - Can you provide a line for Finland as well?

There were 2 regression lines in Fig 1b, one for Finland and one for the other stations. Those regression lines were basically identical and therefore not very well visible. Figure 1b has completely been changed according to suggestions of referee 1 (major comment) and we now show a separate Figure (Fig.2) with histograms of the FWI values and correlation coefficients.

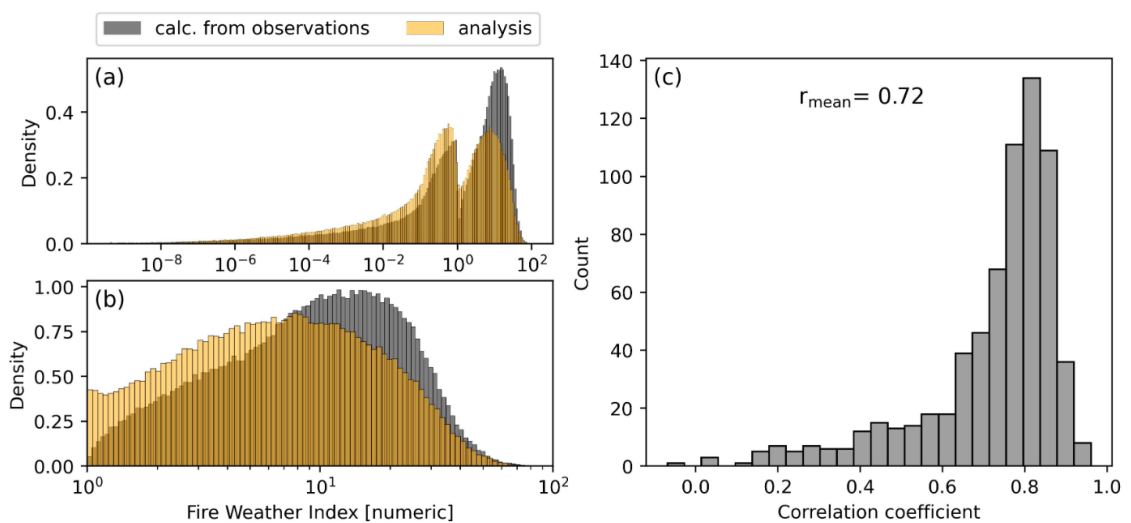

Fig.2

- Fig 1c:

- Please show a 3<sup>rd</sup> station for WCE.
- Add the location of the stations in Fig 1a.
- Why are there missing values in the Greece station in the winter of 2022 and 2023? You previously stated that all your selected stations have a sufficient data coverage. Please clarify that your consecutive 200 days refer to the summer half (?) in the Figure caption.

We added a third station (Meiningen, Germany) as an example for WCE and marked its location on Fig. 1a. Accessing data of stations outside Finland with year-round continuous data proved challenging. To expand our analysis to stations outside of Finland, we included stations with some missing data, as long as they had at least 200 continuous days of data. This period isn't restricted to summer months. We chose this 200-day threshold to avoid too frequent reinitialization of the FWI calculation, which could affect the comparison of observation and analysis.

27. Line 77: Provide a reference to Fig 1b as your statements originate from the figure.

Fig 1b has been updated and mentioned scatterplot is no longer shown in the updated manuscript.

28. Line 77 and Fig 1b: Is your, I assume linearly derived correlation, mainly driven by the large number of low FWI values? Fig 1c shows quite apparent that for high FWI values the underestimation is much stronger pronounced than for low FWI values. This would be also a good point to be discussed in the discussion.

The correlation is indeed mainly driven by the large amount of low FWI values, which is one reason we decided not to present the scatterplot and linear correlation in the revised manuscript. Instead, we show the distribution of FWI values calculated from observation and analysis using histograms (Fig. 2a,b) and the distribution of the linear correlation coefficient in Fig.2c. Furthermore, we point out that the especially for high FWI values the analysis is underestimating the FWI with regard to the observation when referring to Fig.1 b,c,d.

29. Line 79: Provide a reference to Fig 1c.

Fig. 1c has been updated to Fig.1 b,c,d. References to the respective figure are added in the revised manuscript.

30. Line 80: Please clarify which datasets you use for longer forecasts.

We use the medium-range ECMWF ensemble forecast and clarified this in the revised manuscript.

31. Line 83: Please clarify which dataset(s) you mean by the FWI forecasts.

We added “*medium-range*” to the FWI forecasts to clarify which forecasts we mean. With the changes made in Section 2.2, it should now be clearer which dataset we refer to.

32. Line 86: Please specify what you are calibrating, e. g. the parameters of the NGR or the whole post-processing pipeline.

We added that we are calibrating the FWI forecasts to this sentence.

33. Line 86: It should be: “the FWI”.

We added the article.

34. Line 91: Please clarify from which dataset the 51 ensemble members come, e. g. by adding (ENS) in brackets. You describe the statistical part very clearly, but it is not clear to which datasets you are applying the formulas.

The ECMWF ENS forecast is no longer mentioned in the revised manuscript. With the changes made to Sect.2.3.1, it should be evident that the calibration is done for the FWI calculated from the ECMWF forecasts (derived from TIGGE database).

35. Line 96: Please specify what the training area is.

In this study the AR6 WGI reference regions are used as training areas. We agree that the training areas need to be introduced already when explaining the NGR method and therefore moved the introduction of the AR6 WGI reference regions from the results section to Sect. 2.3.1.

*“The training data is defined using a specific training area and a 30-day rolling window preceding the forecast as training period. As training areas, we use here climatic reference regions, defined by the 6th IPCC Assessment Report (AR6-WGI (Iturbide et al., 2020)), which divide the European domain into Northern Europe (NEU), West and Central Europe (WCE), and the Mediterranean (MED). In this study, however, we use only the European part north of the Mediterranean Sea, referred to hereafter as the European Mediterranean (EUMED). The reference regions are*

*marked grey in Fig.1(a). The calibration can also be performed over smaller geographical areas, e.g., individual countries.”*

36. Line 97: Why do you switch terminology from NGR to EMOS, I understand that this is the approach, but it would be good to decide for one name.

We removed the reference to EMOS to avoid confusion.

37. Lines 98 -100: Can you provide results, e. g. a table or a plot, for these findings. This could be part of your supplementary material.

We added an additional figure in the Supplementary material Fig. S1. This figure shows the average CRPS for a test time period (June-July 2021) using different training areas.

38. Line 100: Here it becomes apparent, that it is not clear what the training area and hence smaller geographical training areas should be. Please clarify and provide results in the supplementary material.

In the revised manuscript, we now introduce the concept of training areas prior to this statement (see comment 35) and clarify that smaller geographical regions can also be used for calibration purposes. We hope this revision makes the meaning of training areas clear.

39. Line 114: Please add a note that you call RMSE later spread and skill metric (i. e. line 122 and line 144).

This has been clarified in the text.

40. Line 142: please clarify that you compare fire season length of Northern Europe to Southern Europe.

We added the note that we compare Northern and Southern Europe here.

*“The main fire season in Europe is typically from May until October but varies strongly in length and intensity across regions, e.g. the fire season starts later and is shorter in Northern Europe compared to Southern Europe (San-Miguel-Ayanz et al., 2012).”*

41. Line 145: the grid points “within” rather than “of” the three study areas.

We changed the wording accordingly.

42. Line 146: I can't follow how you derived the RSME of the climatology. Can you describe this briefly.

We added a brief explanation how the climatology RMSE is calculated as follows:

*"The RMSE of the climatology, shown by the solid blue line, is calculated similarly to the forecast RMSE. However, it uses the climatology derived from 40 years of ERA5 reanalysis data (see Sec.2.2) for each day of the year instead of using the forecast."*

43. Line 151, Line 163: clarify that your calibration is done as a post-processing.

This is now clarified in the first sentence of the Results section:

*"In this section, we present results of post-processing FWI forecasts of the years 2021 to 2023 by applying the introduced calibration method."*

44. Line 152: Specify what you mean by short lead times, e. g. 132h?

In this specific case, we decided to drop the part of the sentence mentioning short lead times. Short lead times refer only to the NEU region (~132h) while the RMSE of the calibrated forecast is still smaller than the RMSE of the raw forecasts up to 228h for WCE and 300h for EUMED. These lead times are mentioned in the subsequent sentences.

45. Line 154: Provide lead time in hours in brackets after "7 days", i. e. 7 days (168 h).

We included the lead times in hours in brackets after every following mention of the lead time in days. It has to be noted that the lead time in hours doesn't exactly match the time in days because the FWI forecast is done for 12 UTC using the forecast initiated at 00 UTC. The first day's forecast has therefore a lead time of 36 hours and not 24 hours.

46. Figure 2:

- Add labels (letters a, b, c) to subplots.
- Place legend outside of NEU to make it clear it belongs to all three subplots.
- Adjust the y-axis label (Spread/ RMSE) to your figure caption, which is currently "spread and skill". I would expect them to be the same, e. g. spread and RSME in the figure caption or spread and skill in the y-axis label.



All suggestions have been applied to Fig.2 (now Fig.3). We adjusted it to be Spread/RMSE on caption and y-axis label.

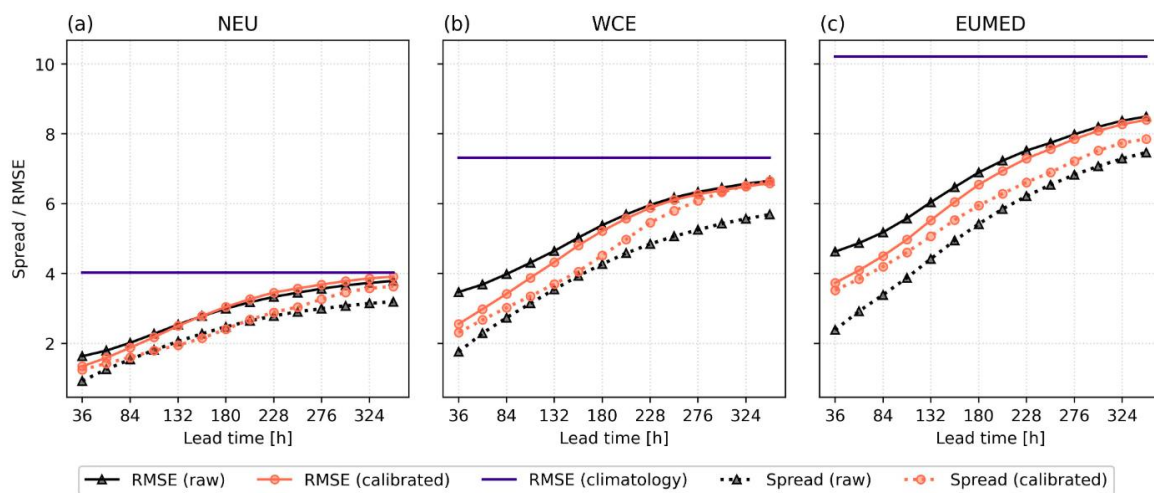

Fig.3

47. Line 157: Rather the three subregions than the respective area.

The sentence has been rephrased accordingly.

48. Line 158: Rephrase “too low” to something like “lower than observations”.

We rephrased the sentence to:

*“Uncalibrated forecasts have a negative bias for all lead times, indicating that the forecasted FWI values are consistently lower than the observed values.”*

49. Line 160: “The improvement” instead of “This improvement”.

We changed the article accordingly.

50. Line 164: Provide numbers for what you think is slightly positive.

We provide numbers of the positive mean error now.

*“In Northern and Central Europe, the bias is slightly positive after calibration especially for longer lead times, ranging from less than 0.1 to 0.4.”*

51. Line 167: specify short lead times.

We specified here that lead times up to 84 hours are considered short lead times.

52. Line 166 – 169: This finding would be a good point to discuss in the discussion. For example, I would be interested what these findings imply for the application of your suggested post-processing technique.

This has been added to the discussion in “4. Discussion and conclusion”, see major comment 7.

53. Figure 3: please add letters to subregions.

The abbreviation of the subregions has been added to the caption.

54. Figure 4: Please add letters to subregions.

The abbreviation of the subregions has been added to the caption.

55. Figure 4 caption: drop “the grid of”.

“the grid of” has been dropped.

56. Lines 171 – 172: Can you discuss this in your discussion section? Does your approach perform well for higher FWI values, suggested by the better performance in WEU in July and August and MED? Does your approach need to perform well on or low no-fire danger days?

This has been added to the discussion in “4. Discussion and conclusion”, see major comment 7.

57. Figure 5:

- Add labels to the subplots (i. e., a, b, c, d)
- Plot the land-sea boundary to improve the visualization.
- Drop the large white space in the south and west of the plot in such a manner that the plot is filled with results.

All suggestions to improve the visualization of Figure 5 (now Figure 6) have been implemented, additionally we changed the map projection to be in accordance with the map in Figure 1.

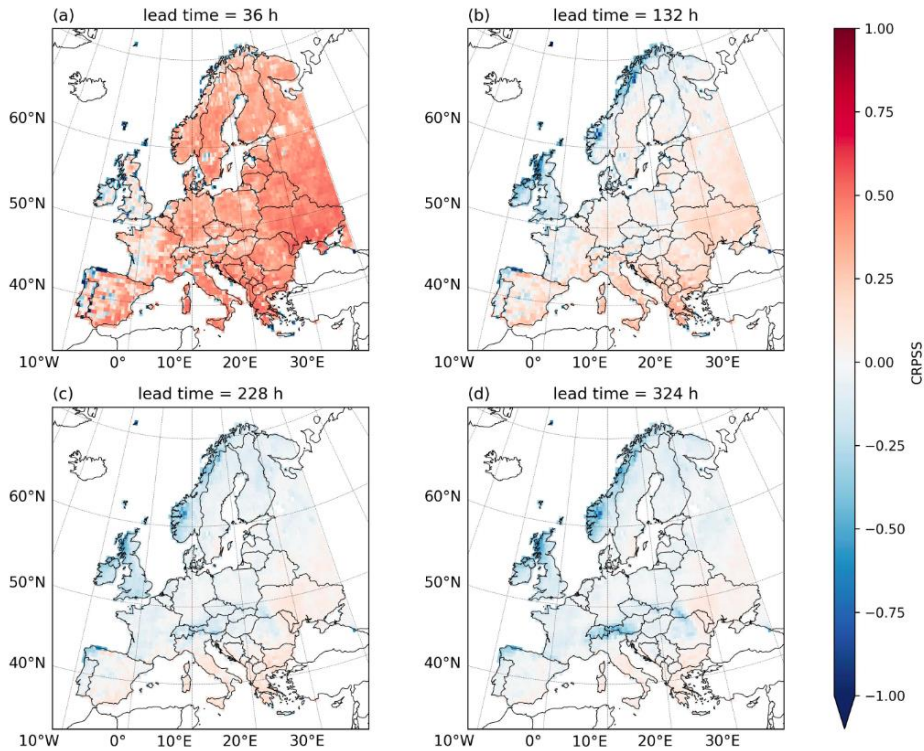

*Fig.6*

58. Line 176: Here you mention the first time that you calibrate the coefficients of the NGR, this is not clear in your previous description of the post-processing method. Please clarify this in the method section. In Line 176 add “of the NGR” after “to estimate the calibration coefficients”.

We added “of the NGR” to the sentence. The method section has been improved and is hopefully clearer now.

59. Line 177 - 179: This sentence belongs to the discussion section and not the conclusion session. Also, I suggest adding more meaning to this sentence, e. g. what are the implications of sparsely available data?

We removed this sentence from the conclusion.

60. Line 180: Drop “Thus”.

“Thus” has been dropped.

61. Line 180: which dataset do you mean by high-resolution weather forecast with short lead time? Is this the third dataset you introduced in the data section?

Yes, the high-resolution forecasts are the third dataset that is introduced. We restructured the Forecast and observation data section (now Sec. 2.2.) and hope it is now clear what we mean with high-resolution data throughout the manuscript.

62. Line 181: Make clear that you mean the dataset “analysis” and not the analysis of the FWI.

We added a reference to the previous sentence to make clear that we mean the FWI calculated by the forecast when referring to analysis.

63. Line 189: At the end of your conclusion, I would expect a last sentence coming back to your initial statement that this is important for fire resource management and the SAFERS project. Please add such a sentence.

We added a sentence to the conclusion that highlights the significance of our findings for fire resource management as follows:

“Reliable and accurate forecasts, particularly when the fire risk is high and over the short-term time frame, are crucial for decision-makers and emergency responders to effectively coordinate resources. The improvement of FWI forecasts using the presented calibration method improves the ability to anticipate fire danger, ultimately supporting better response management.”

64. Line 209: Add “Di” to “Di Giuseppe”.

We fixed this mistake in the reference.

65. Line 249: Add “Van” to “Van Wagner”.

We fixed this mistake in the reference.
